# Supplementary material for: NK cell recruitment limits tissue damage during an enteric helminth infection
Source: PubMed Central journal article supplement (PMC7039810; doi:10.1038/s41385-019-0231-8), 2019-11-27
Supplement: 41385_2019_231_MOESM1_ESM.pdf [file 41385_2019_231_MOESM1_ESM.pdf]

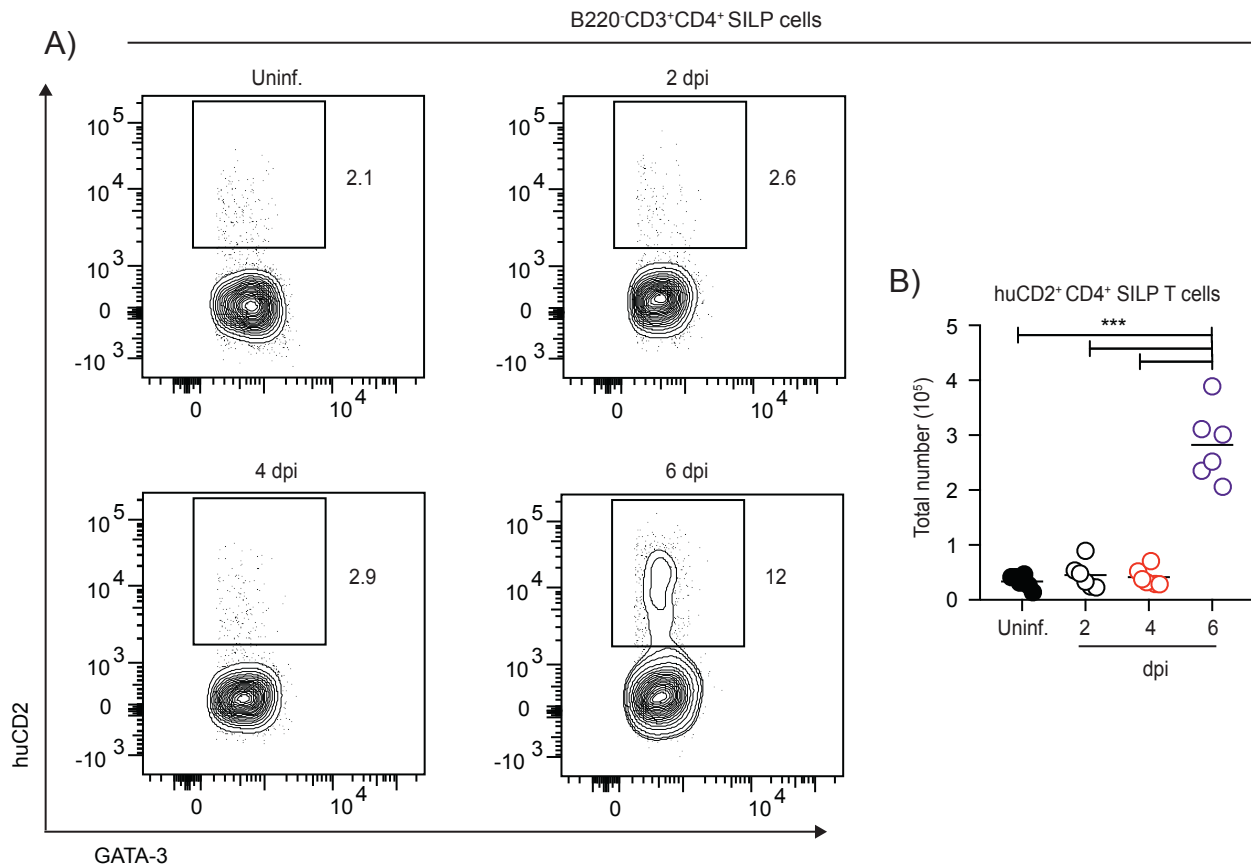

**IL-4 producing GATA-3<sup>+</sup> Th2 cells are first detectable at day 6 in the SILP during *Hpb* infection.**

**A)** Representative contour plots and **B)** total number of CD45<sup>+</sup>B220<sup>+</sup>CD3<sup>+</sup>CD4<sup>+</sup>GATA-3<sup>+</sup>huCD2<sup>+</sup> T cells in the SILP of uninfected and *Hpb*-infected 4get/KN2 mice at the indicated time points. huCD2 is the reporter for IL-4<sup>+</sup> secreting cells. **B)** Data pooled from two independent experiments and analysed by one-way ANOVA with Dunnet's post-test for multiple comparisons, using uninfected as the control group (\*\*\*)  $p < 0.001$ ). Each dot represents an individual mouse.

A)

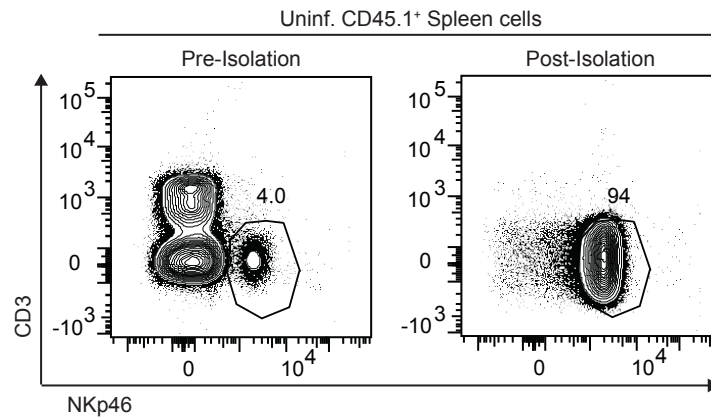

B)

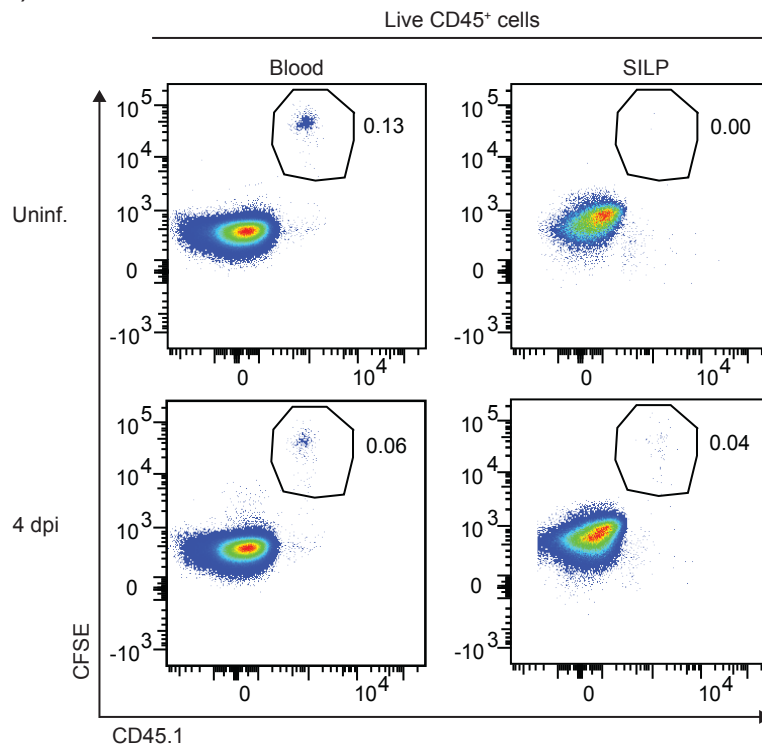

**Purity and detection of CFSE<sup>+</sup> NK cells.** Purified CD45.1<sup>+</sup> splenic NK cells were transferred into CD45.2<sup>+</sup> recipient mice. **A)** Contour plots of (CD3<sup>+</sup>NKp46<sup>+</sup>) NK cell frequency pre-and post-isolation. **B)** Representative pseudocolor plots of CFSE-labelled CD45.1<sup>+</sup> cells in the blood and SILP of uninfected and 4 days *Hpb*-infected CD45.2<sup>+</sup> mice.

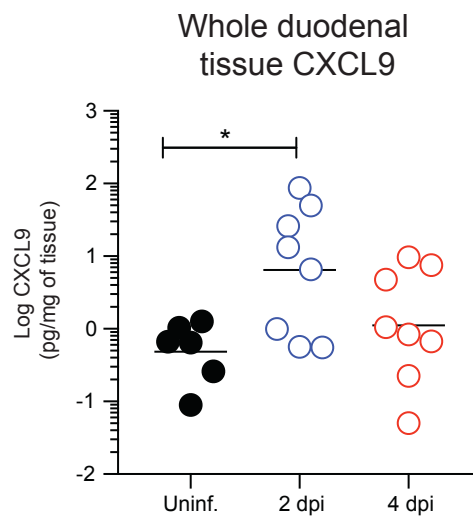

**CXCL9 protein is increased in the small intestine during *Hpb* infection.** Total CXCL9 protein measured from whole duodenal tissue homogenates from uninfected mice, or 2 and 4 day *Hpb*-infected mice. Data pooled from two independent experiments and analysed by one-way ANOVA with Dunnet's post-test for multiple comparisons, using uninfected as the control group (\* $p < 0.05$ ). Each dot represents an individual mouse.

Co-housed mice

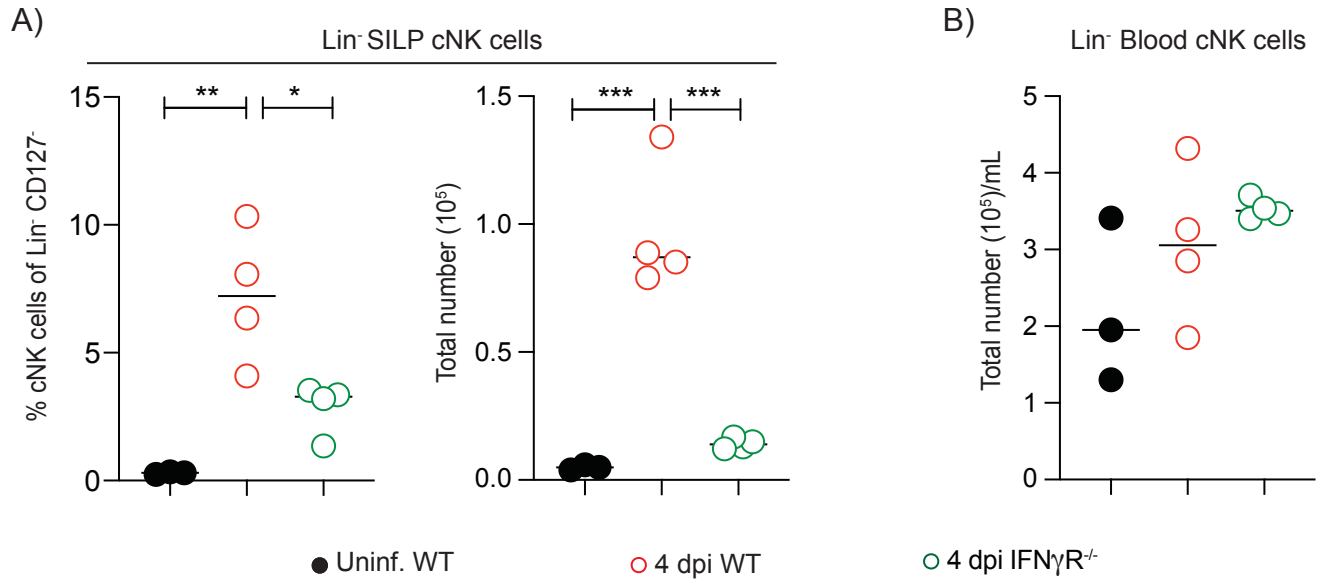

**Co-housing does not impact the requirement for IFN $\gamma$  signaling in cNK cell recruitment to the SILP during *Hpb* infection. A)** Frequencies and total numbers of cNK cells in the SILP of uninfected WT, 4 dpi WT and IFN $\gamma$ R<sup>-/-</sup> mice after a 4 week co-housing period. **B)** Total numbers of cNK cells per mL of blood in uninfected WT, 4 dpi WT and IFN $\gamma$ R<sup>-/-</sup> co-housed mice. Data was analysed by one-way ANOVA with Tukey's post-test for multiple comparisons (\*p < 0.05, \*\*p < 0.001, \*\*\*p < 0.001). Each dot represents an individual mouse.

## Supplementary Figure 5

A)

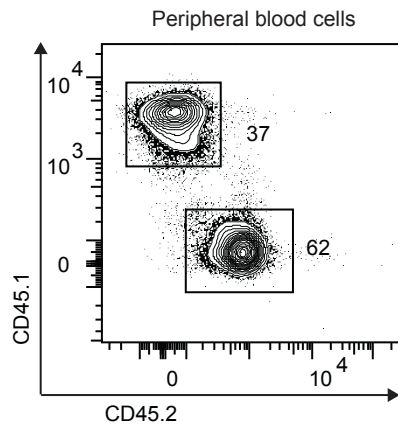

B)

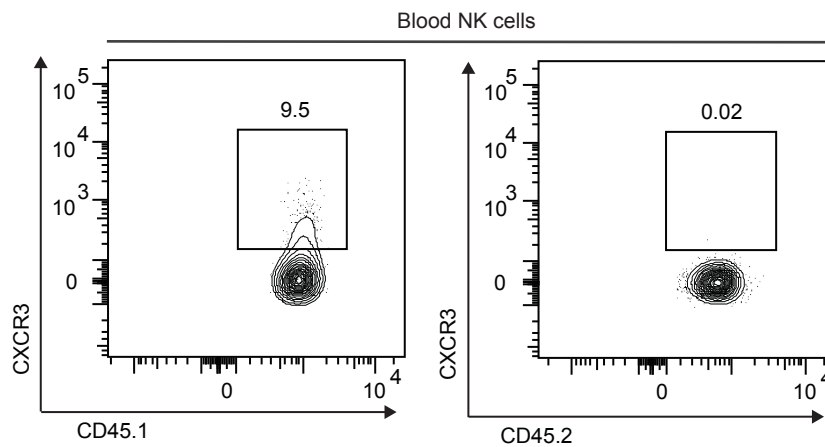

**Quality controls for the CXCR3 mixed bone marrow chimera experiments. A)** Representative contour plots of the frequency of WT (CD45.1<sup>+</sup>) and CXCR3<sup>-/-</sup> (CD45.2<sup>+</sup>) cells in the blood prior to infection of the chimeric mice 12 weeks after BM transplantation. **B)** Representative contour plots of CXCR3 expression by CD127<sup>-</sup>NK1.1<sup>+</sup> NK cells in the blood of uninfected chimeric mice.
